# Supplementary material for: Neutral polysaccharide from Gastrodia elata alleviates cerebral ischemia–reperfusion injury by inhibiting ferroptosis‐mediated neuroinflammation via the NRF2/HO‐1 signaling pathway
Source: PubMed Central journal article supplement (PMC10916450; doi:10.1111/cns.14456), 2023-09-26

Figure 1F

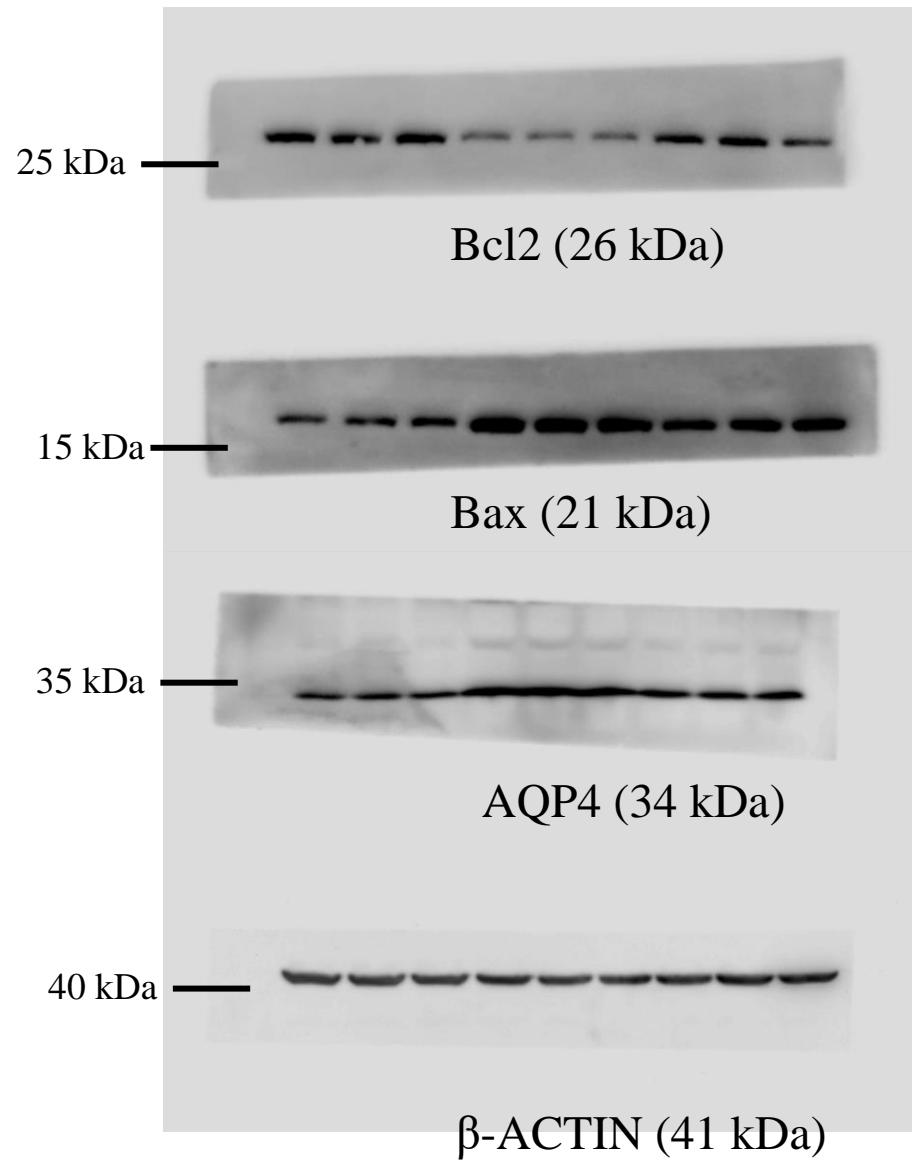

Figure 1L

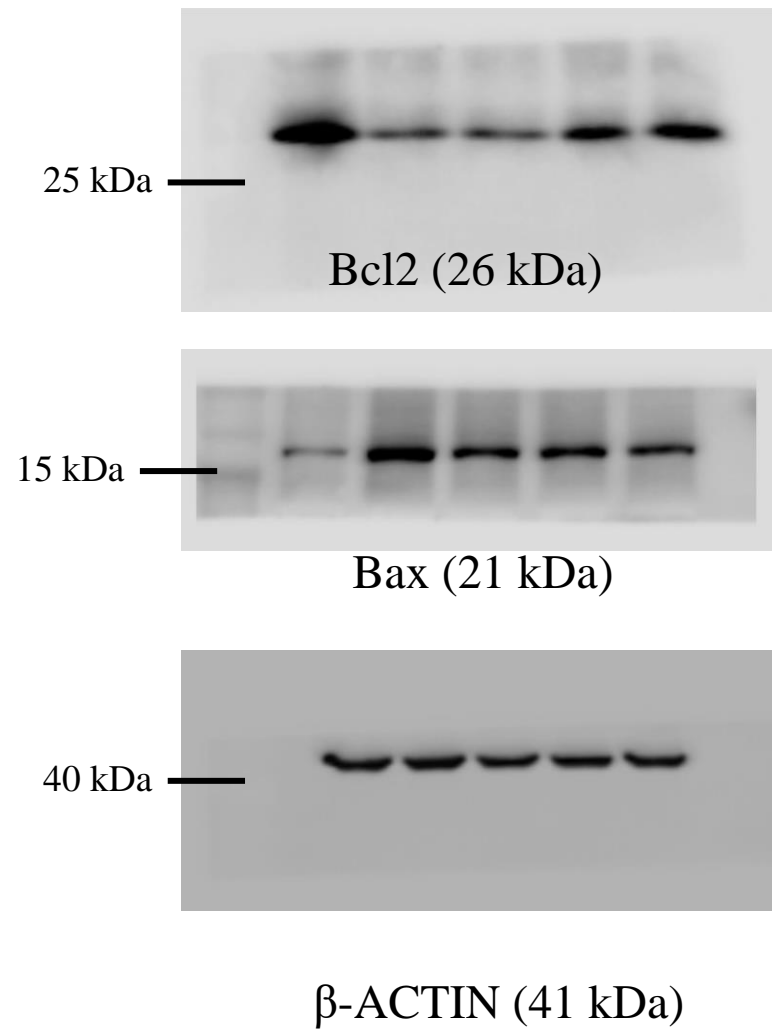

Figure 3F

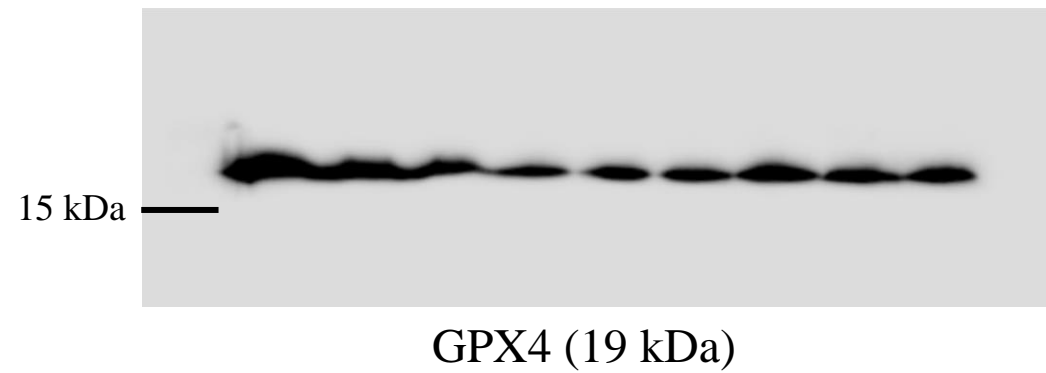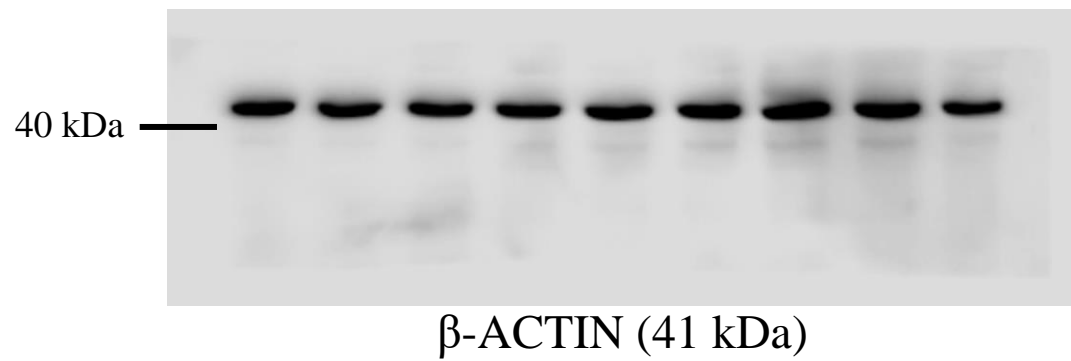

Figure 3G

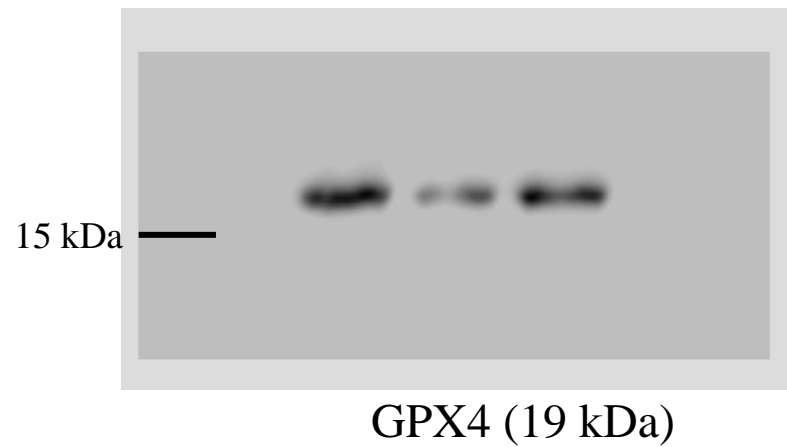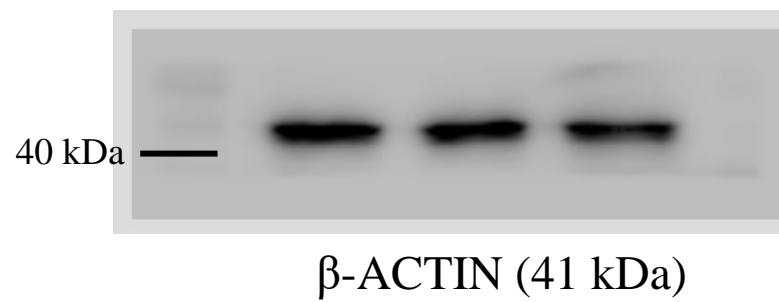

Figure 4A

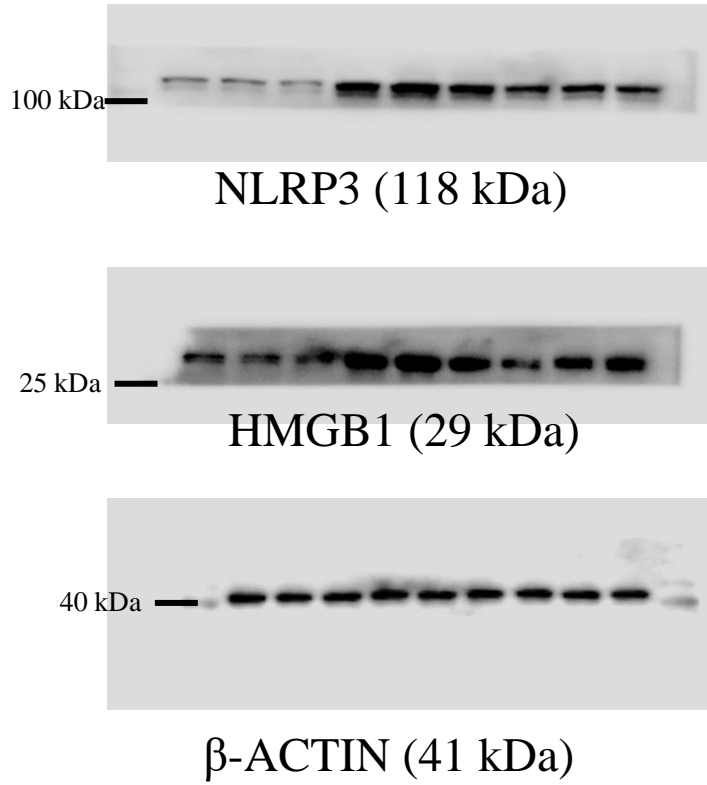

Figure 4E

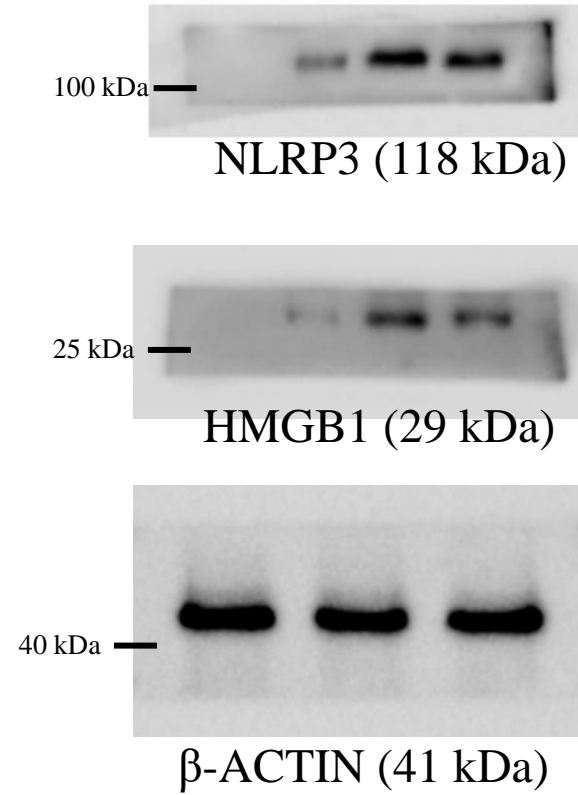

Figure 4N

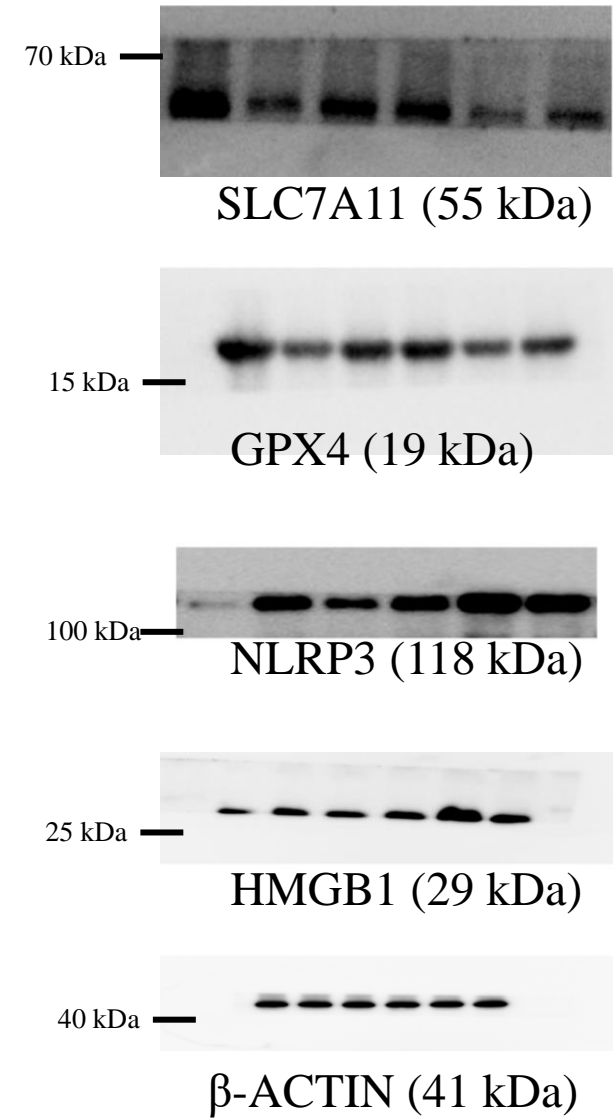

Figure 5A

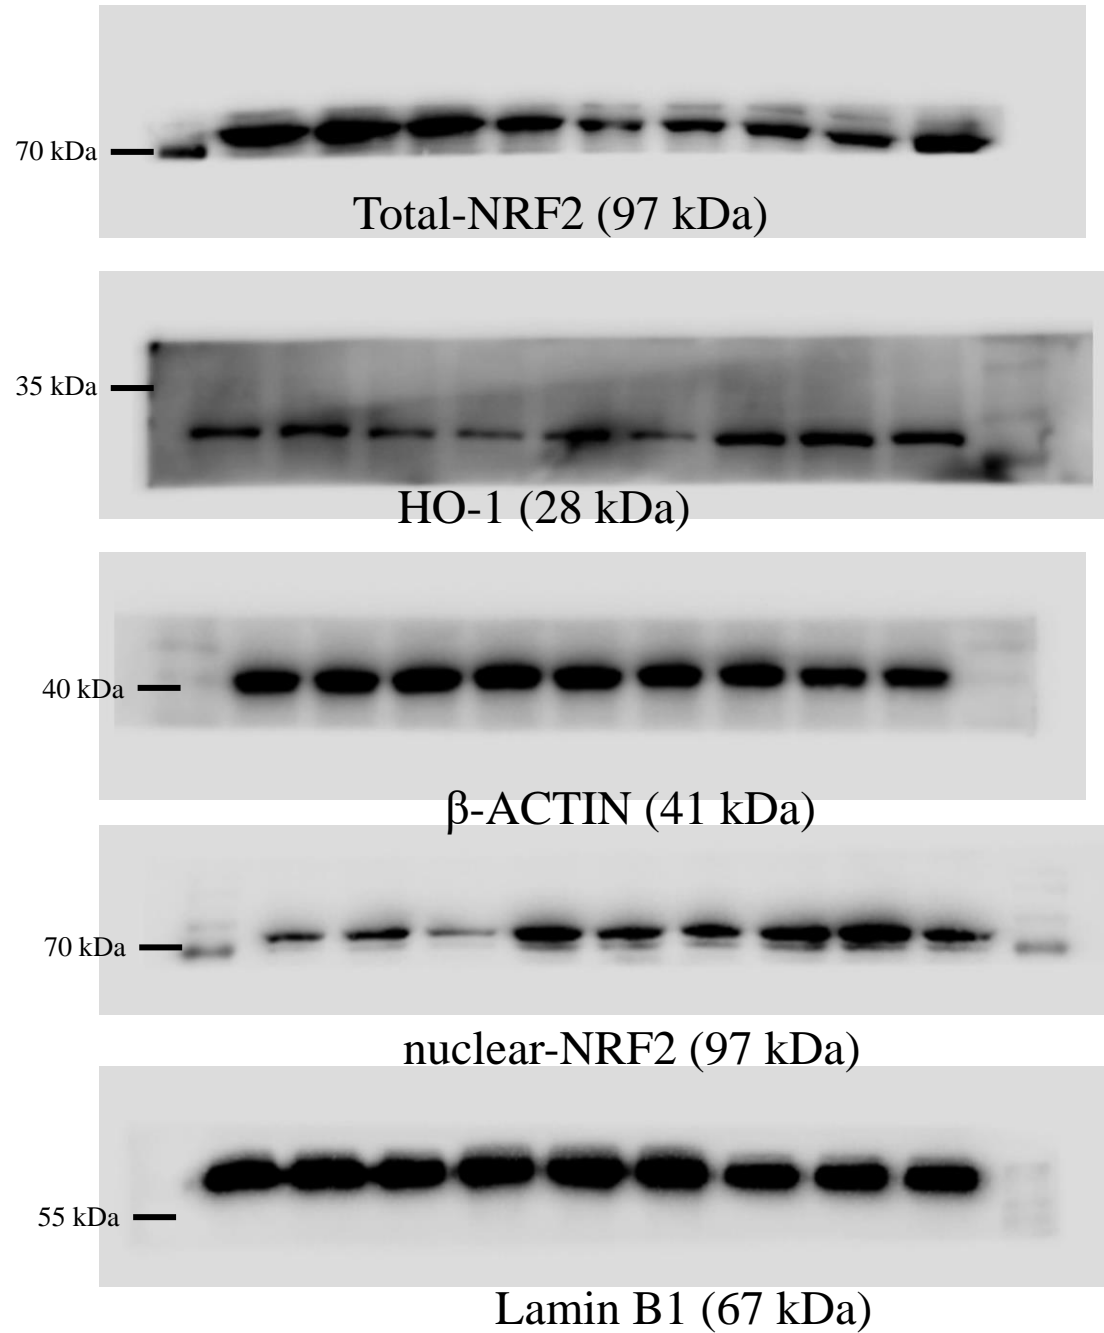

Figure 5B

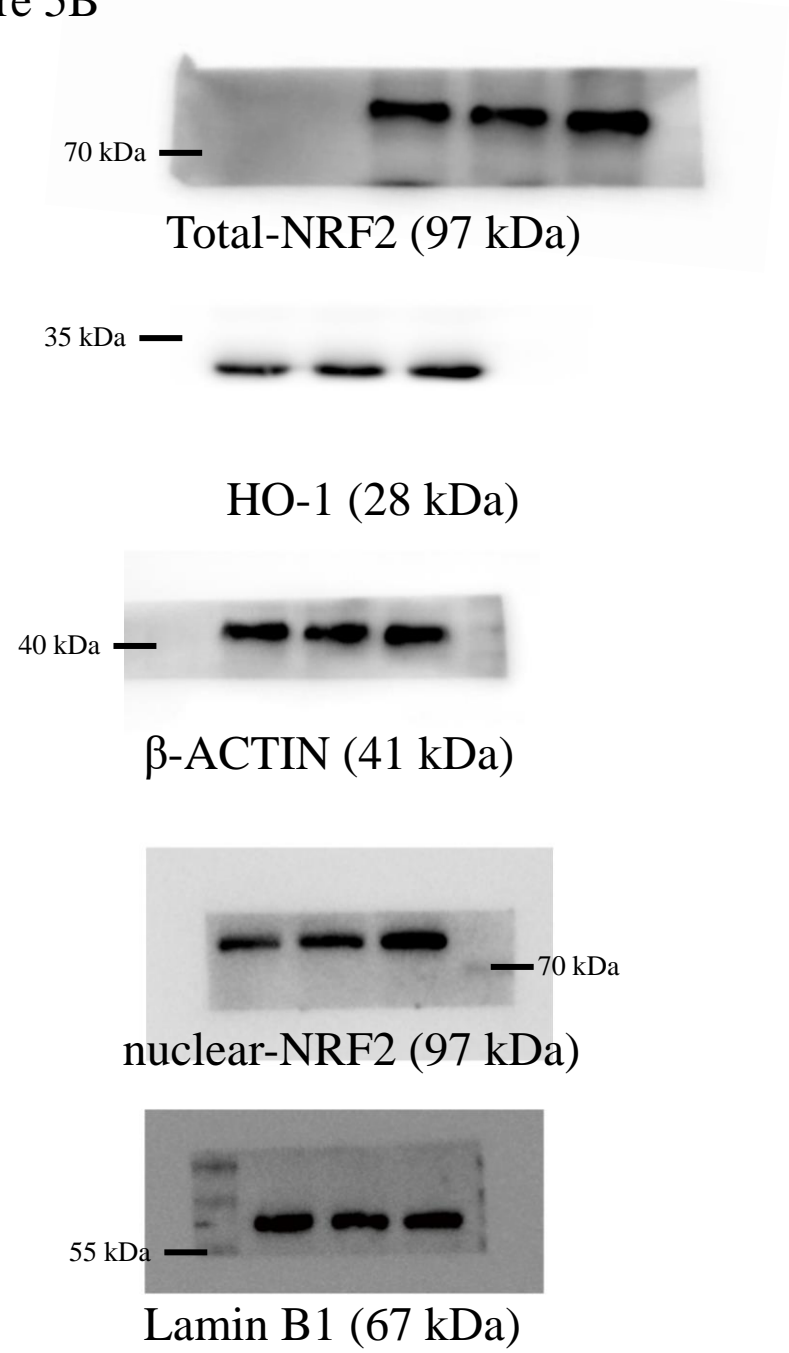

Figure 6F

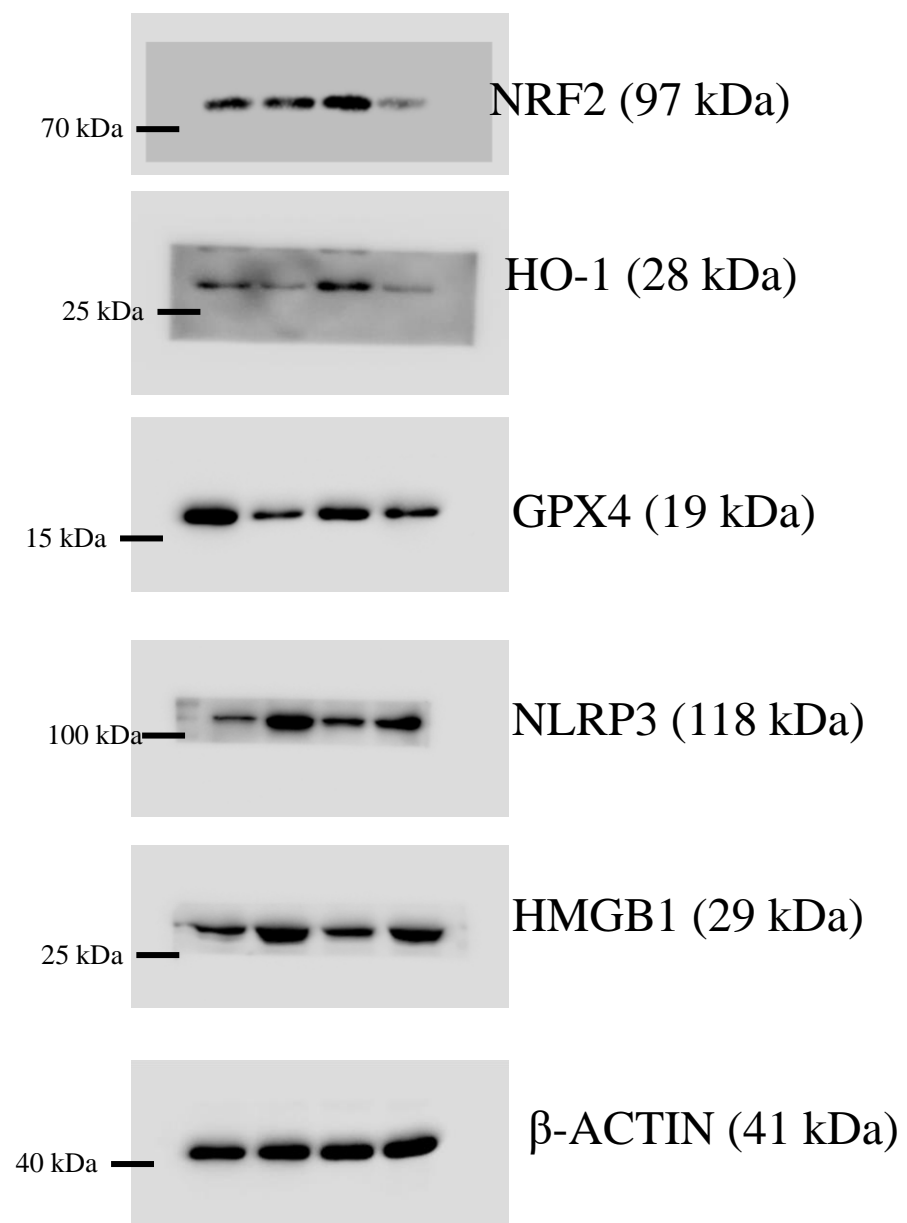

Figure 6G

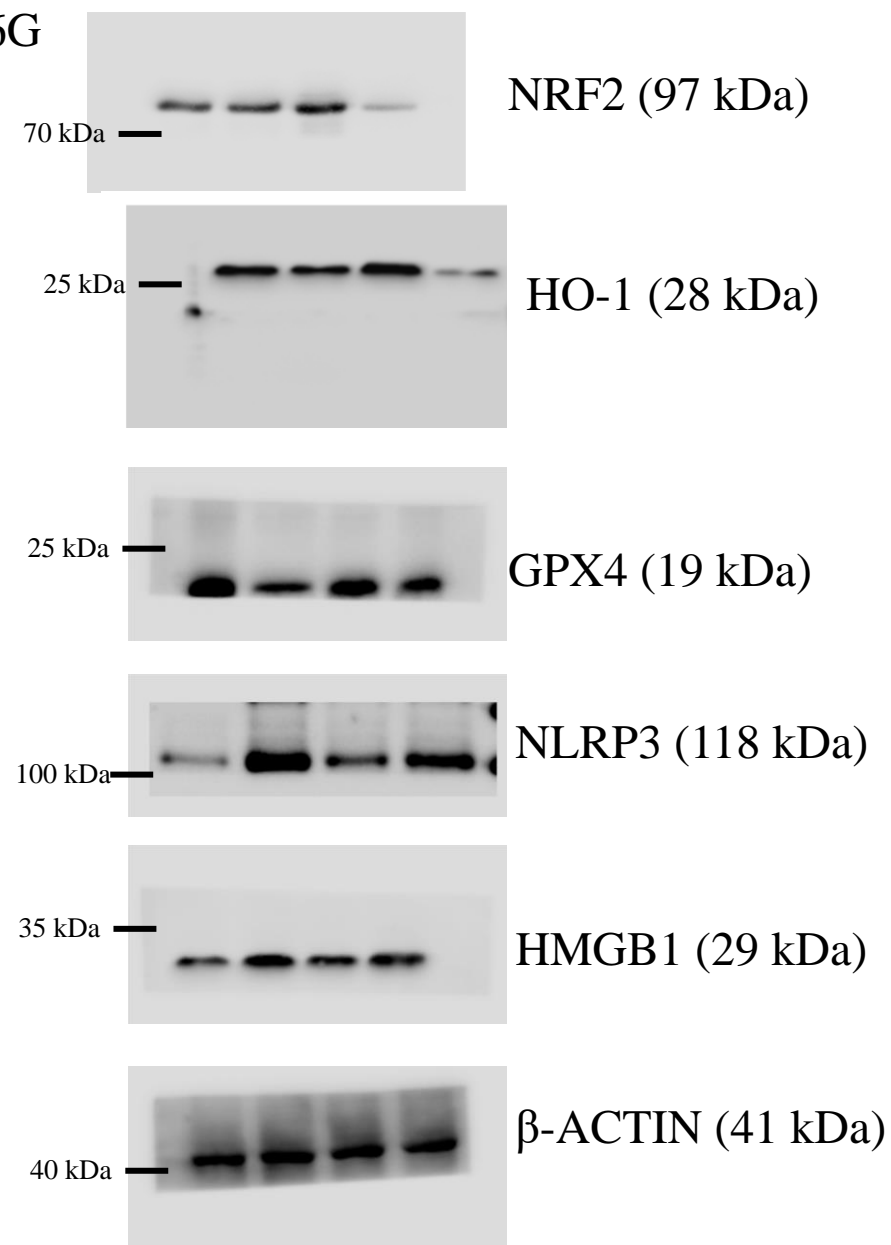

Supplement: CNS-30-e14456-s002.pdf [file CNS-30-e14456-s002.pdf]
